# Supplementary material for: RUNX1-dependent RAG1 deposition instigates human TCR-δ locus rearrangement
Source: PubMed Central journal article supplement — J Exp Med. 2014 Aug 25;211(9):1821–32. doi: 10.1084/jem.20132585 (PMC4144731; doi:10.1084/jem.20132585), 2014-08-25
Supplement: supp_jem.20132585_JEM_20132585_sm.pdf [file supp_jem.20132585_JEM_20132585_sm.pdf]

SUPPLEMENTAL MATERIAL

Cieslak et al., <http://www.jem.org/cgi/content/full/jem.20132585/DC1>

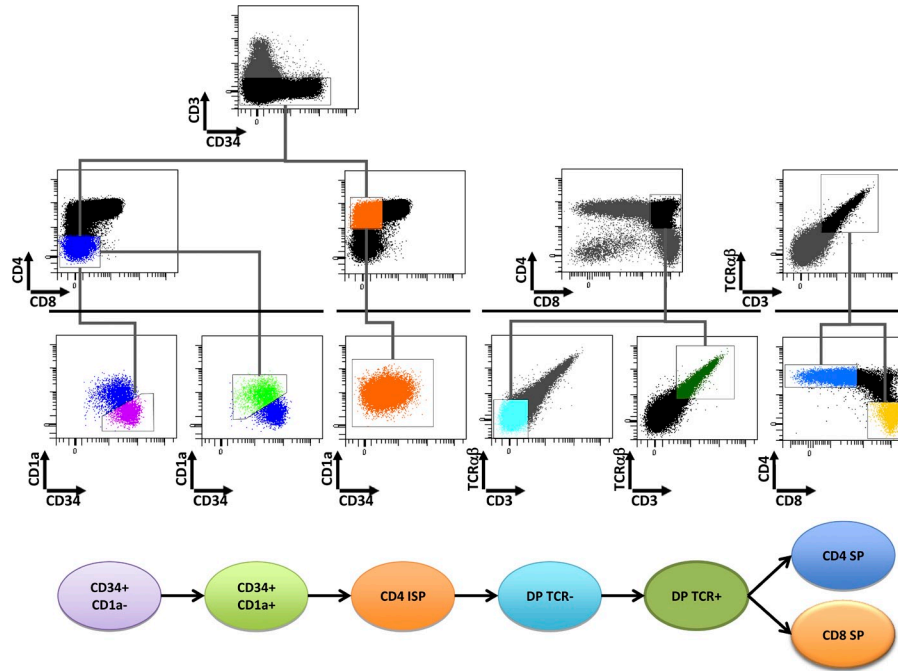

**Figure S1. Major human T cell differentiation stages and gating strategy for cell sorting.** Plots show the gates used for sorting thymic subpopulations. Purity after sort was checked to be >95%. ISP, immature SP.
